# Supplementary material
Source: publisher figshare collection journal article supplement (https://acs.figshare.com/ndownloader/files/35486218)
Supplement: Supplementary file 1 [file 35486218]

## Supporting information

### **Mass Spectrometry-Based Analysis of Serum N-Glycosylation Changes in Patients with Parkinson's Disease**

Mingming Xu,<sup>1,#</sup> Hong Jin,<sup>2,#</sup> Zhen Wu,<sup>3</sup> Ying Han,<sup>4</sup> Jing Chen,<sup>2</sup> Chengjie Mao,<sup>2</sup>  
Piliang Hao,<sup>4</sup> Xumin Zhang,<sup>3</sup> Chun-Feng Liu<sup>2,5</sup> and Shuang Yang<sup>1,\*</sup>

<sup>1</sup>*Center for Clinical Mass Spectrometry, College of Pharmaceutical Sciences, Soochow University, Suzhou, 215123, China.*

<sup>2</sup>*Department of Neurology, The Second Affiliated Hospital of Soochow University, Suzhou, 215004, China.*

<sup>3</sup>*State Key Laboratory of Genetic Engineering, Department of Biochemistry, School of Life Sciences, Fudan University, Shanghai, 200438, China.*

<sup>4</sup>*School of Life Science and Technology, ShanghaiTech University, Shanghai, 201210, China*

<sup>5</sup>*Jiangsu Key Laboratory of Neuropsychiatric Diseases and Institute of Neuroscience, Soochow University, Suzhou, 215123, China.*

<sup>#</sup>These authors contributed equally to this work.

## Supplementary Methods

### Glycan Structure Confirmation by LC-MS/MS

Human N-glycans were first labelled by an isobaric tag (QUANTITY).<sup>1</sup> The labelling procedure can introduce a permanently positive-charged quaternary amine to glycans, thus enhancing the ionization efficiency in MS. The dried N-glycans were re-suspended in 100  $\mu$ L reaction solution mixture consisting of anhydrous dimethyl sulfoxide (DMSO) and acetic acid (AA) (7:3, vol) in the presence of 1 M NaCNBH<sub>3</sub>. QUANTITY 178 (100 mM) dissolved in 200  $\mu$ L mixture of DMSO and AA (7:3) were added into each sample respectively and incubated at 65 °C for 4 h. The reaction was quenched by addition of 2 mL water and 2  $\mu$ L concentrated formic acid. QUANTITY-labelled N-glycans were cleaned up by C18 purification. The purified samples were dissolved in 40  $\mu$ L of 0.2% formic acid.

Then the labelled N-glycans were separated and analyzed on an Ultimate 3000 UHPLC coupled to a Thermo Orbitrap Elite<sup>TM</sup> mass spectrometer. N-glycans were separated in an Acclaim<sup>TM</sup> PepMap<sup>TM</sup> 100 column (75  $\mu$ m  $\times$  15 cm) packed with C18 (3  $\mu$ m, 100Å) at a flow rate of 250 nL/min. Mobile phase A (0.1 % formic acid) and mobile phase B (0.1 % formic acid in 80 % ACN) were used to establish a 120 min gradient comprised of 0.1 min of 6 % B, 54 min of 6-22 % B, 51 min of 22-50 % B, 5 min of 50-60 % B, 1 min of 60-90 % B and 9 min of 90 % B. The other parameters were the same as those in the glycopeptide analysis (please refer to Materials and Methods in the main text).

The acquired MS/MS spectra were matched with the theoretical glycan fragments created by the GlycoWorkbench software.

## Supplementary Tables and Figures

Table S1. Demographic information of healthy controls and PD patients

|                        | Control       | PD            | Between group differences |                |
|------------------------|---------------|---------------|---------------------------|----------------|
|                        |               |               | Statistic                 | <i>p</i> value |
| Number of participants | 30            | 40            |                           |                |
| Age mean (SD)          | 58.87 (4.862) | 62.60 (11.08) | t=1.722                   | 0.0896         |
| Gender male/female     | 15/15         | 21/19         | $\chi^2=0.04289$          | 0.8359         |

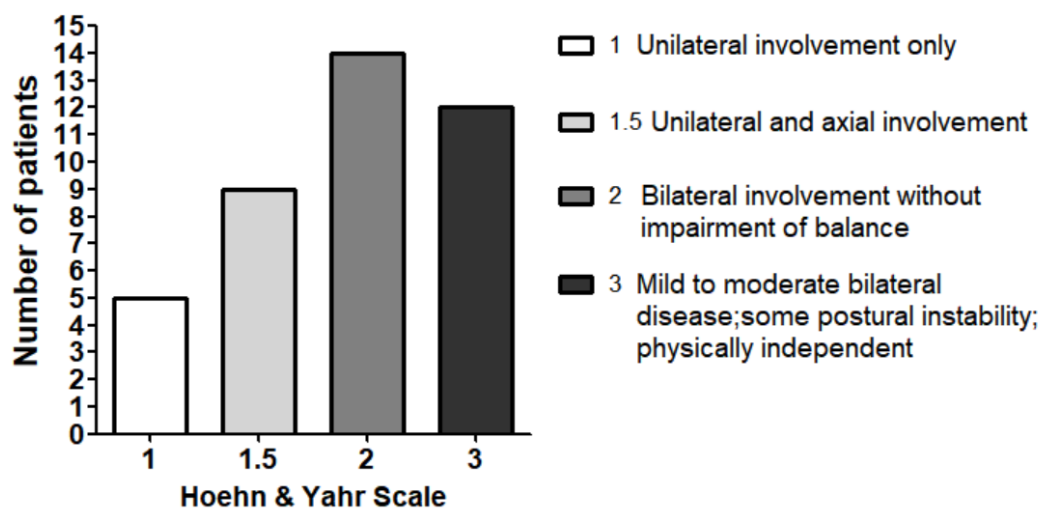

Figure S1. The Hoehn and Yahr Scales of all 40 PD patients in our study. Descriptions of symptoms at different stages are also provided.

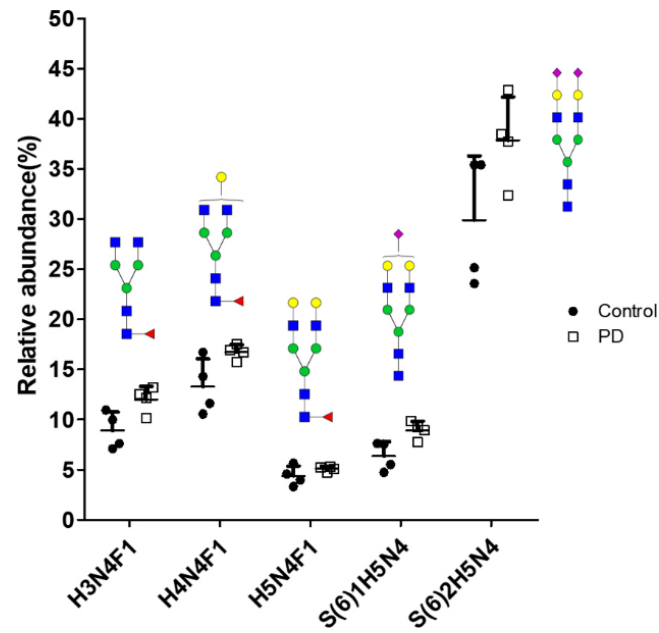

Figure S2. The scatter plot of ion abundances for 5 highly abundant N-glycans in control and PD serum samples. The black dots represent the control group while the white squares represent the PD group. Data were acquired from four independent experiments.

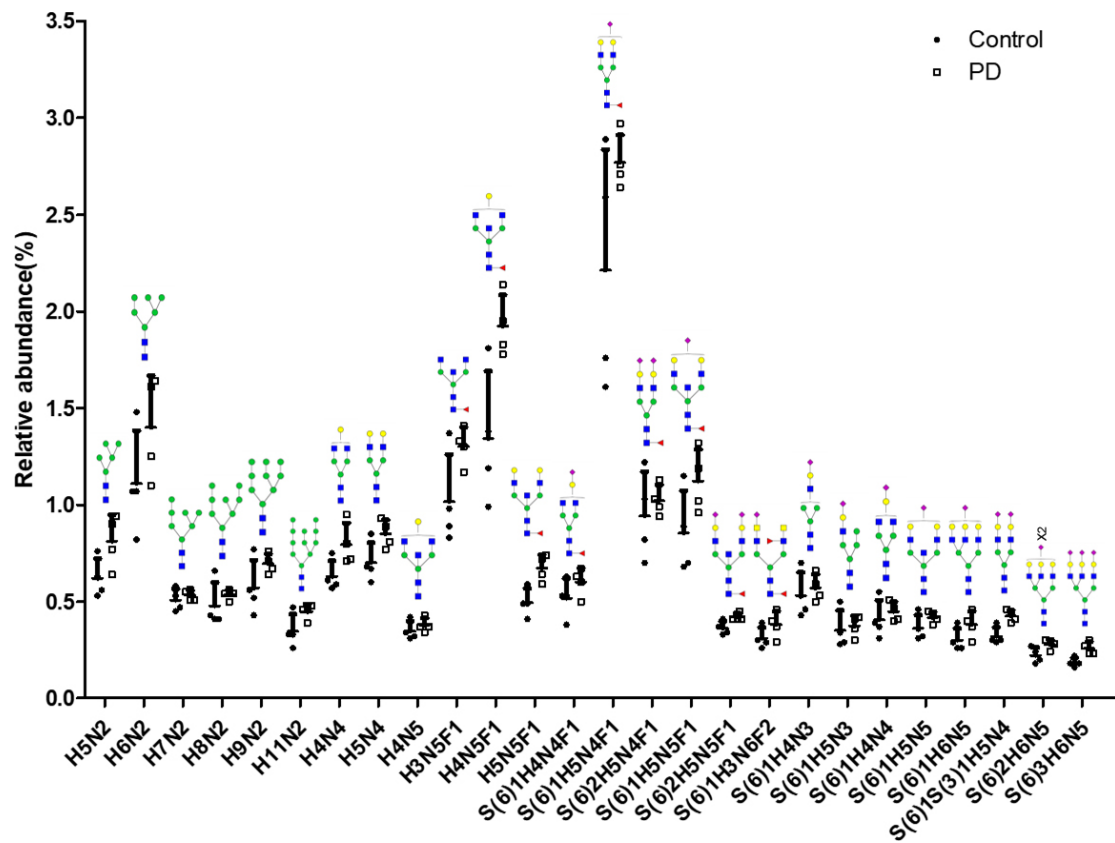

Figure S3. The scatter plot of ion abundances for 27 low abundant N-glycans in control and PD serum samples. The black dots represent the control group while the white squares represent the PD group. Data were acquired from four independent experiments.

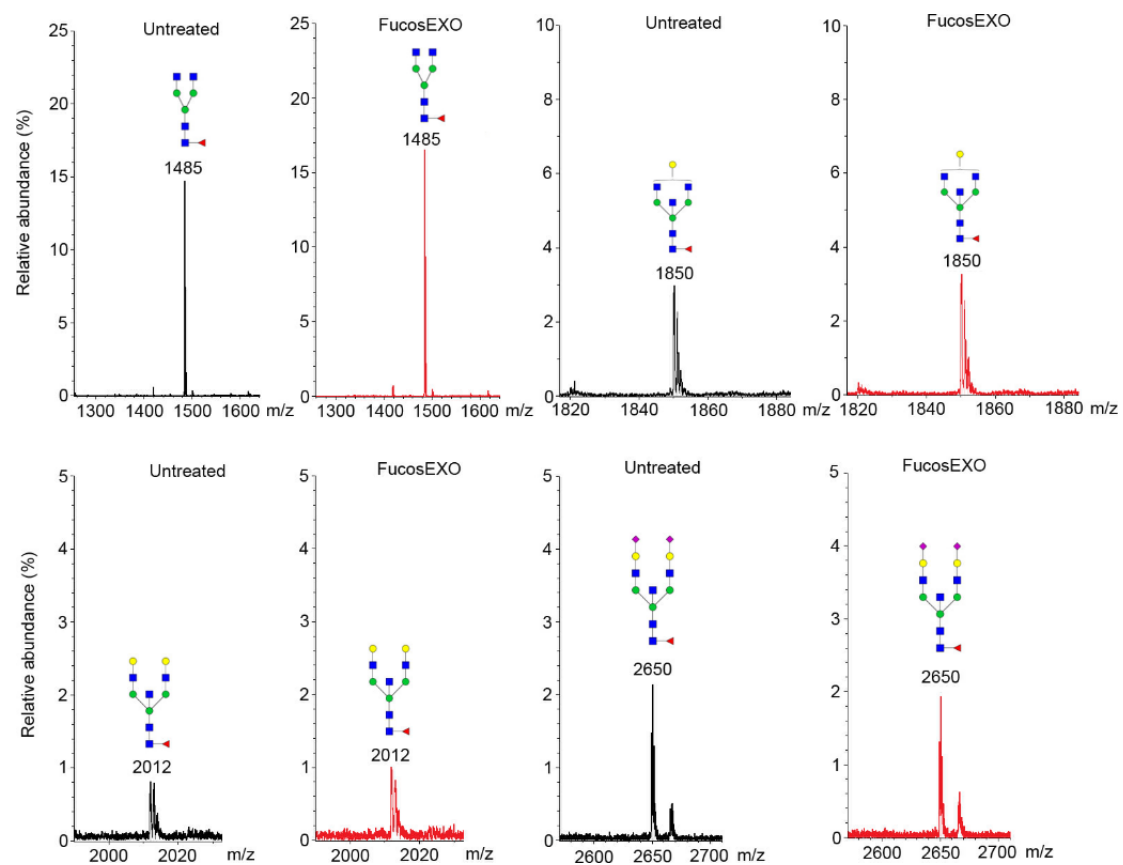

Figure S4. MALDI-MS spectra of fucose-attached glycans (H3N4F1, H4N5F1, H5N5F1 and S(6)2H5N5F1) treated without and with  $\alpha$ 1-2,3,4 fucosidase (FucosEXO).

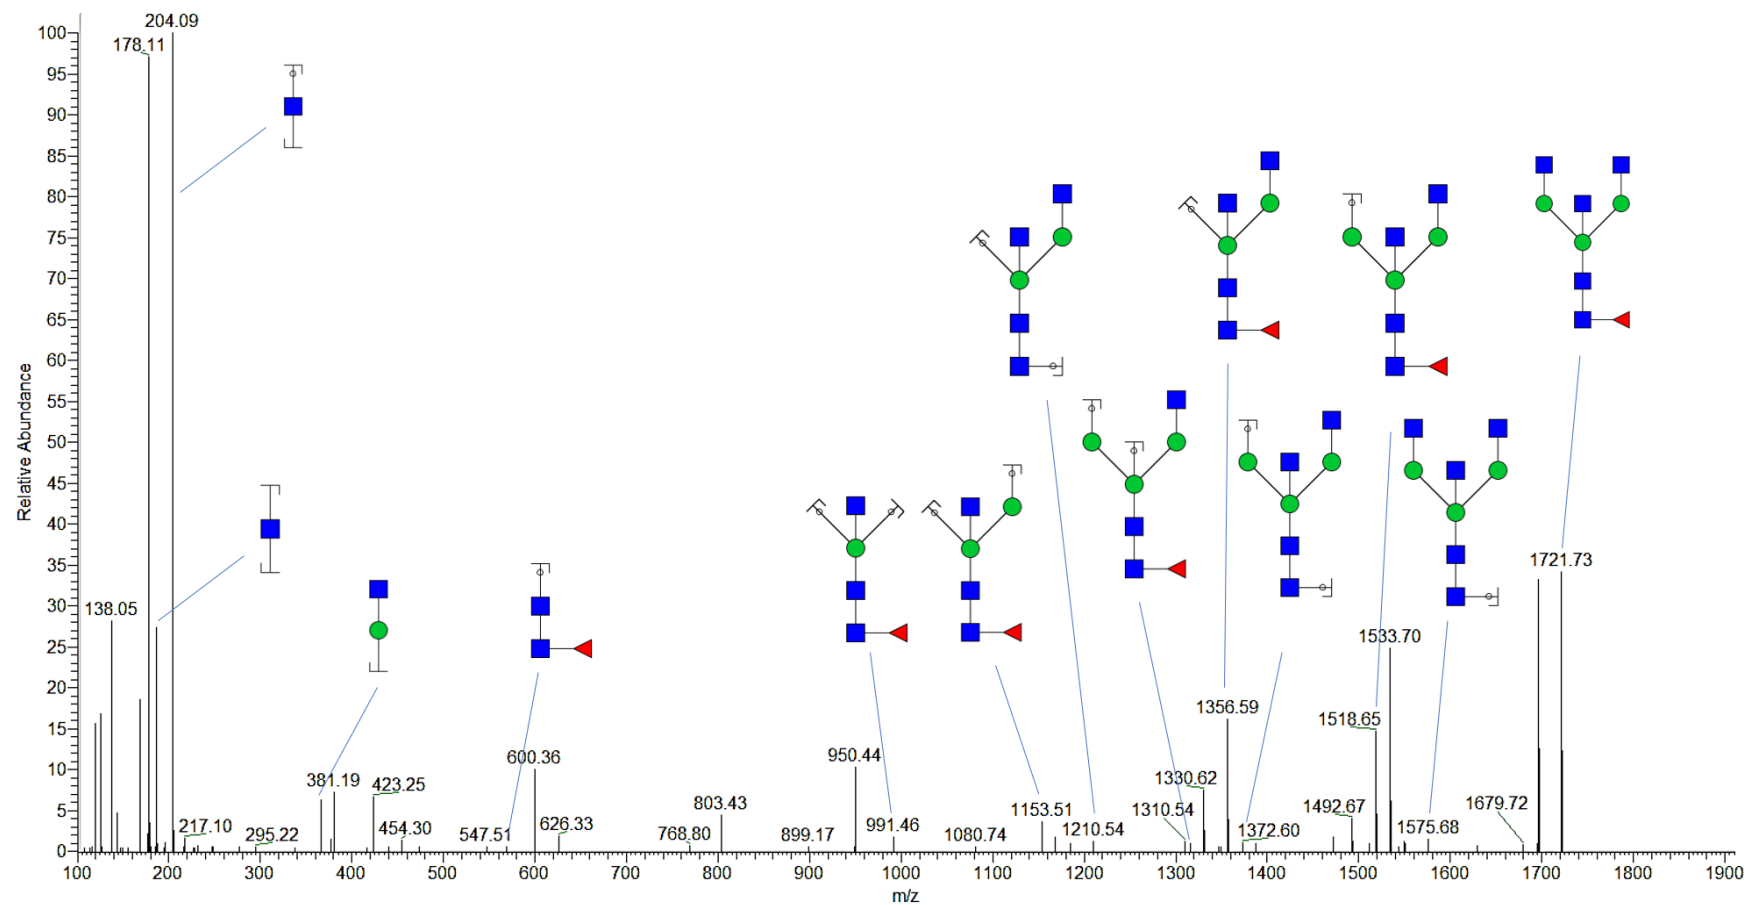

Figure S5. MS/MS fragment ion spectra of the selected bisecting structure (H3N5F1) detected in human serum. Human serum N-glycans were labeled with an isobaric tag (QUANTITY 178) for better ionization efficiency. As a result, fragment ions containing the first GlcNAc on the reducing end showed a mass increase of 55 Da. The reporter ion with a m/z of 178 was clearly observed in the spectrum, demonstrating the success of QUANTITY labelling.

Table S2. List of proteins identified by lectin affinity purification

| AAL           |                                                    | SNA           |                                       | MALII         |                                       |
|---------------|----------------------------------------------------|---------------|---------------------------------------|---------------|---------------------------------------|
| Accession No. | Protein name                                       | Accession No. | Protein name                          | Accession No. | Protein name                          |
| A0AUZ9        | KAT8 regulatory NSL complex subunit 1-like protein | P00450        | Ceruloplasmin                         | O95497        | Pantetheinase                         |
| O75443        | Alpha-tectorin                                     | P00734        | Prothrombin                           | P00450        | Ceruloplasmin                         |
| O94916        | Nuclear factor of activated T-cells 5              | P00738        | Haptoglobin                           | P00734        | Prothrombin                           |
| P00450        | Ceruloplasmin                                      | P00739        | Haptoglobin-related protein           | P00738        | Haptoglobin                           |
| P00738        | Haptoglobin                                        | P01008        | Antithrombin-III                      | P01008        | Antithrombin-III                      |
| P00739        | Haptoglobin-related protein                        | P01009        | Alpha-1-antitrypsin                   | P01009        | Alpha-1-antitrypsin                   |
| P01009        | Alpha-1-antitrypsin                                | P01011        | Alpha-1-antichymotrypsin              | P01011        | Alpha-1-antichymotrypsin              |
| P01011        | Alpha-1-antichymotrypsin                           | P01023        | Alpha-2-macroglobulin                 | P01023        | Alpha-2-macroglobulin                 |
| P01023        | Alpha-2-macroglobulin                              | P01024        | Complement C3                         | P01024        | Complement C3                         |
| P01024        | Complement C3                                      | P01031        | Complement C5                         | P01031        | Complement C5                         |
| P01860        | Immunoglobulin heavy constant gamma 3              | P01042        | Kininogen-1                           | P01042        | Kininogen-1                           |
| P01861        | Immunoglobulin heavy constant gamma 4              | P01860        | Immunoglobulin heavy constant gamma 3 | P01860        | Immunoglobulin heavy constant gamma 3 |
| P01871        | Immunoglobulin heavy constant mu                   | P01861        | Immunoglobulin heavy constant gamma 4 | P01861        | Immunoglobulin heavy constant gamma 4 |
| P02766        | Transthyretin                                      | P01871        | Immunoglobulin heavy constant mu      | P01871        | Immunoglobulin heavy constant mu      |
| P02787        | Serotransferrin                                    | P01876        | Immunoglobulin heavy constant alpha 1 | P01876        | Immunoglobulin heavy constant alpha 1 |
| P07333        | Macrophage colony-stimulating factor 1 receptor    | P01877        | Immunoglobulin heavy constant alpha 2 | P02671        | Fibrinogen alpha chain                |
| P08603        | Complement factor H                                | P02671        | Fibrinogen alpha chain                | P02748        | Complement component C9               |
| P10909        | Clusterin                                          | P02749        | Beta-2-glycoprotein 1                 | P02749        | Beta-2-glycoprotein 1                 |
| P35125        | Ubiquitin carboxyl-terminal hydrolase 6            | P02751        | Fibronectin                           | P02751        | Fibronectin                           |

|        |                                               |        |                                                    |        |                                              |
|--------|-----------------------------------------------|--------|----------------------------------------------------|--------|----------------------------------------------|
| P49746 | Thrombospondin-3                              | P02766 | Transthyretin                                      | P02760 | Protein AMBP                                 |
| Q02224 | Centromere-associated protein E               | P02787 | Serotransferrin                                    | P02763 | Alpha-1-acid glycoprotein 1                  |
| Q5VV63 | Attractin-like protein 1                      | P02790 | Hemopexin                                          | P02765 | Alpha-2-HS-glycoprotein                      |
| Q8NDA2 | Hemicentin-2                                  | P04004 | Vitronectin                                        | P02766 | Transthyretin                                |
| Q9BSJ5 | Uncharacterized protein C17orf80              | P04114 | Apolipoprotein B-100                               | P02787 | Serotransferrin                              |
| Q9NYQ6 | Cadherin EGF LAG seven-pass G-type receptor 1 | P05154 | Plasma serine protease inhibitor                   | P02790 | Hemopexin                                    |
|        |                                               | P05155 | Plasma protease C1 inhibitor                       | P03952 | Plasma kallikrein                            |
|        |                                               | P05546 | Heparin cofactor 2                                 | P04003 | C4b-binding protein alpha chain              |
|        |                                               | P08603 | Complement factor H                                | P04114 | Apolipoprotein B-100                         |
|        |                                               | P10909 | Clusterin                                          | P05155 | Plasma protease C1 inhibitor                 |
|        |                                               | P19652 | Alpha-1-acid glycoprotein 2                        | P05546 | Heparin cofactor 2                           |
|        |                                               | P19823 | Inter-alpha-trypsin inhibitor heavy chain H2       | P07357 | Complement component C8 alpha chain          |
|        |                                               | P19827 | Inter-alpha-trypsin inhibitor heavy chain H1       | P08603 | Complement factor H                          |
|        |                                               | P02763 | Alpha-1-acid glycoprotein 1                        | P09871 | Complement C1s subcomponent                  |
|        |                                               | P23142 | Fibulin-1                                          | P10643 | Complement component C7                      |
|        |                                               | P35916 | Vascular endothelial growth factor receptor 3      | P10909 | Clusterin                                    |
|        |                                               | P82094 | TATA element modulatory factor                     | P13725 | Oncostatin-M                                 |
|        |                                               | P98164 | Low-density lipoprotein receptor-related protein 2 | P19652 | Alpha-1-acid glycoprotein 2                  |
|        |                                               | Q13029 | PR domain zinc finger protein 2                    | P19823 | Inter-alpha-trypsin inhibitor heavy chain H2 |
|        |                                               | Q15303 | Receptor tyrosine-protein kinase erbB-4            | P19827 | Inter-alpha-trypsin inhibitor heavy chain H1 |
|        |                                               | Q494X3 | Zinc finger protein 404                            | P22792 | Carboxypeptidase N subunit 2                 |
|        |                                               | Q52LW3 | Rho GTPase-activating protein 29                   | P22891 | Vitamin K-dependent protein Z                |
|        |                                               | Q5VV63 | Attractin-like protein 1                           | P25311 | Zinc-alpha-2-                                |

|  |  |        |                                                           |        |                                               |
|--|--|--------|-----------------------------------------------------------|--------|-----------------------------------------------|
|  |  |        |                                                           |        | glycoprotein                                  |
|  |  | Q6N041 | Uncharacterized protein<br>DKFZp686O16217                 | P27169 | Serum<br>paraoxonase/arylesterase<br>1        |
|  |  | Q6N091 | Uncharacterized protein<br>DKFZp686C02220                 | Q03591 | Complement factor H-<br>related protein 1     |
|  |  | Q86TH1 | ADAMTS-like protein 2                                     | Q2KJY2 | Kinesin-like protein<br>KIF26B                |
|  |  | Q8N139 | ATP-binding cassette<br>sub-family A member 6             | Q5T1H1 | Protein eyes shut<br>homolog                  |
|  |  | Q8N6G6 | ADAMTS-like protein 1                                     | Q6S5L8 | SHC-transforming<br>protein 4                 |
|  |  | Q96MP5 | Zinc finger SWIM<br>domain-containing<br>protein 3        | Q8N139 | ATP-binding cassette<br>sub-family A member 6 |
|  |  | Q96PD5 | N-acetylmuramoyl-L-<br>alanine amidase                    | Q8N6G6 | ADAMTS-like protein 1                         |
|  |  | Q96RV3 | Pecanex-like protein 1                                    | Q96PD5 | N-acetylmuramoyl-L-<br>alanine amidase        |
|  |  | Q9NRF2 | SH2B adapter protein 1                                    | Q9P2N2 | Rho GTPase-activating<br>protein 28           |
|  |  | Q9NZR2 | Low-density lipoprotein<br>receptor-related protein<br>1B |        |                                               |
|  |  | Q9UK05 | Growth/differentiation<br>factor 2                        |        |                                               |

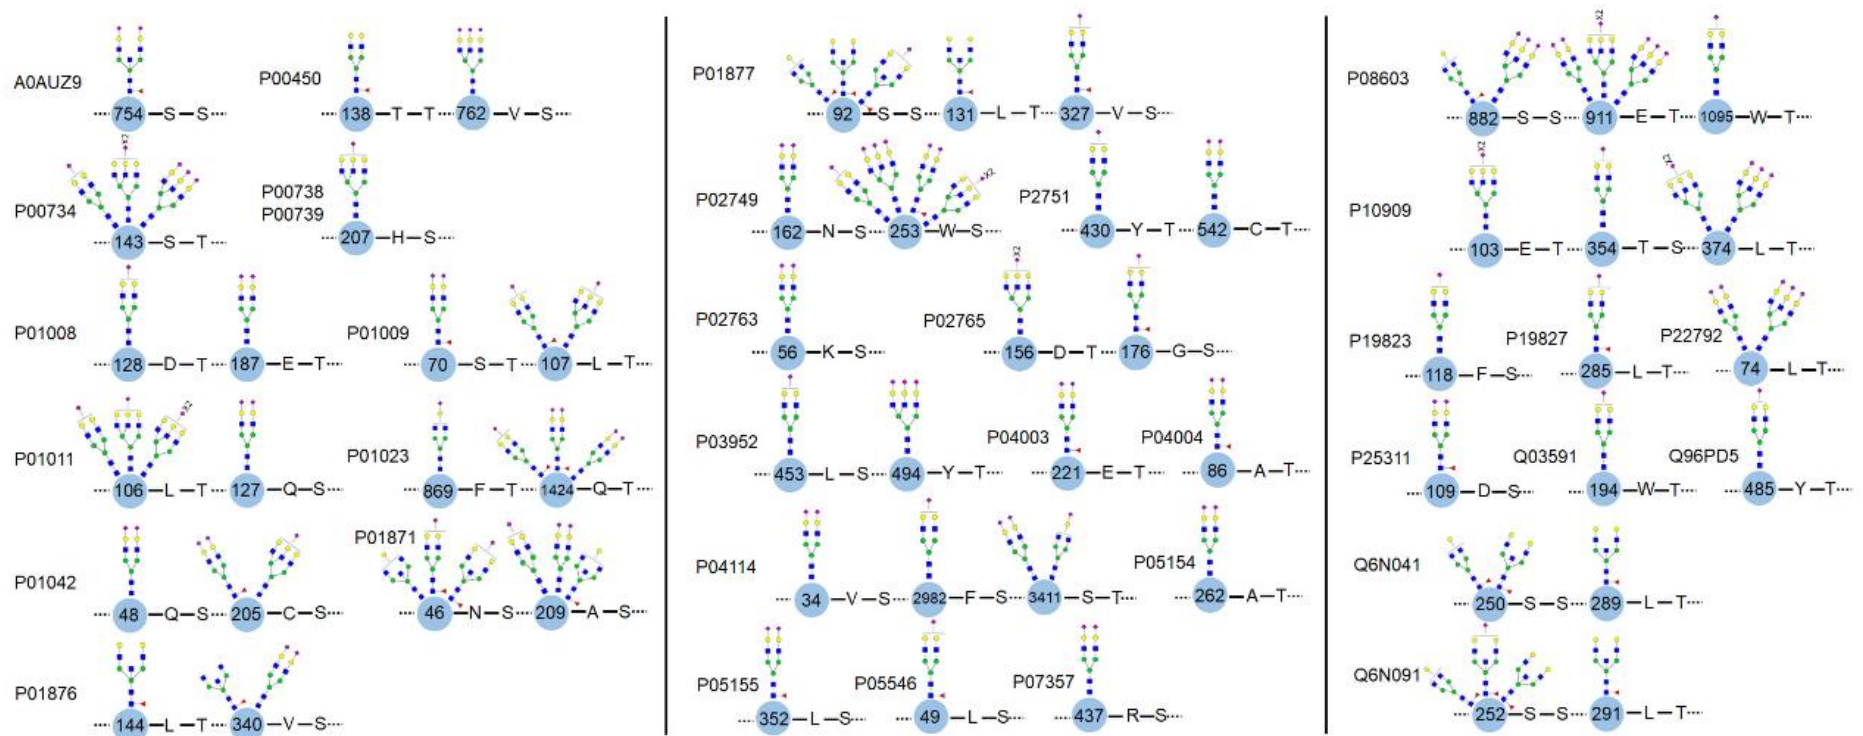

Figure S6. Uniquely identified site-specific N-glycosylation containing core fucose, sialic acids and bisecting GlcNAc in PD patients' sera. The accession numbers and N-glycosylation motifs of relevant glycoproteins are displayed. The number in the blue circles represents the position of asparagine on the protein sequence.

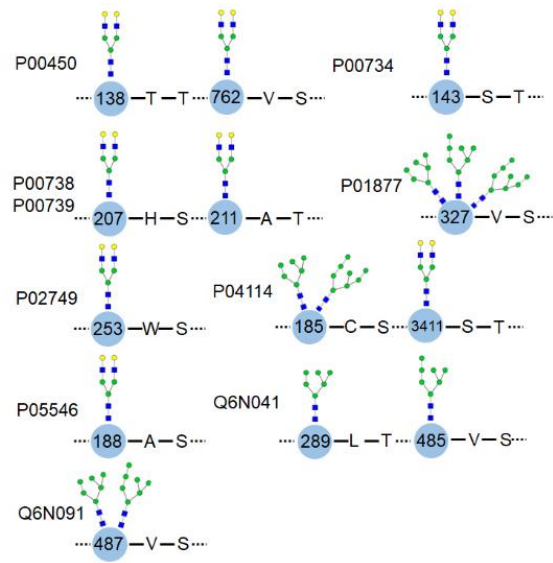

Figure S7. Uniquely identified site-specific N-glycosylation containing complex (without core fucose or sialic acid) and high-mannose N-glycans in PD patients' sera.

Table S3. Common site-specific glycosylation of selected proteins shared by control and PD sera

| Protein name        | Glycosite | Glycan                                                                                                                            |
|---------------------|-----------|-----------------------------------------------------------------------------------------------------------------------------------|
| Ceruloplasmin       | N(138)TT  | S(6)1H4N3, S(6)1H5N4, S(6)2H5N4, S(6)2H6N5, S(6)1S(3)1H6N5, S(6)3H6N5, S(6)1H5N4F1, S(6)2H5N4F1                                   |
|                     | N(358)KS  | S(6)1H5N4, S(6)2H5N4, S(6)2H5N4F1                                                                                                 |
|                     | N(397)LT  | S(6)1H5N4, S(6)2H5N4, S(6)2H6N5, S(6)1S(3)1H6N5, S(6)3H6N5, S(6)1H5N4F1, S(6)2H5N4F1                                              |
|                     | N(762)VS  | S(6)1H4N3, S(6)1H5N4, S(6)2H5N4, S(6)2H6N5, S(6)1S(3)1H6N5, S(6)1H5N4F1, S(6)2H5N4F1                                              |
| Haptoglobin         | N(184)LT  | S(6)1H4N3, S(6)1H4N4, H5N4, S(6)1H5N4, S(6)2H5N4, S(6)1H6N5, S(6)2H6N5, S(6)1S(3)1H6N5, S(6)3H6N5, S(6)1H5N4F1, S(6)2H5N4F1       |
|                     | N(207)HS  | S(6)1H5N4, S(6)2H5N4                                                                                                              |
|                     | N(211)AT  | S(6)1H5N5                                                                                                                         |
|                     | N(241)YS  | S(6)1H4N3, S(6)1H4N4, H4N4, H5N4, S(6)1H5N4, S(6)2H5N4, S(6)1H6N5, S(6)2H6N5, S(6)1S(3)1H6N5, S(6)3H6N5, S(6)1H5N4F1, S(6)2H5N4F1 |
| Kininogen-1         | N(169)NT  | S(6)1H5N4, S(6)2H5N4, S(6)2H6N5, S(6)1S(3)1H6N5                                                                                   |
|                     | N(205)CS  | S(6)2H5N4, S(6)2H6N5, S(6)1S(3)1H6N5, S(6)3H6N5                                                                                   |
|                     | N(294)AT  | S(6)2H5N4, S(6)2H6N5, S(6)1S(3)1H6N5, S(6)3H6N5, S(6)2H5N4F1                                                                      |
| Complement factor H | N(217)GS  | S(6)2H5N4                                                                                                                         |
|                     | N(882)SS  | S(6)1H4N3, H5N4, S(6)1H5N4, S(6)2H5N4, S(6)2H6N5, S(6)1S(3)1H6N5                                                                  |
|                     | N(911)ET  | S(6)1H5N4, S(6)2H5N4                                                                                                              |
|                     | N(1029)VT | S(6)1H5N4, S(6)2H5N4, S(6)1H5N4F1                                                                                                 |
| Clusterin           | N(86)ET   | S(6)1H5N4, S(6)2H5N4, S(6)2H6N5, S(6)1S(3)1H6N5, S(6)3H6N5                                                                        |
|                     | N(103)ET  | S(6)2H5N4, S(6)3H6N5                                                                                                              |
|                     | N(374)LT  | S(6)1H4N3, S(6)1H5N4, S(6)2H5N4                                                                                                   |

## SUPPLEMENTARY RAW MS DATA

The original LC-MS/MS data for HILIC-enrichment glycopeptides were uploaded to Baidu Netdisk. The link for downloading the raw files is: <https://pan.baidu.com/s/109oAAe5Lh2uOocNeYasvsA>. The code for file extraction is 2248.

## REFERENCES

1. Yang, S.; Wang, M.; Chen, L.; Yin, B.; Song, G.; Turko, I. V.; Phinney, K. W.; Betenbaugh, M. J.; Zhang, H.; Li, S., QUANTITY: An Isobaric Tag for Quantitative Glycomics. *Sci. Rep.* **2015**, *5*, 17585.
